# Supplementary material for: Optimal reactive nitrogen control pathways identified for cost-effective PM2.5 mitigation in Europe
Source: PubMed Central journal article supplement (PMC10352319; doi:10.1038/s41467-023-39900-9), 2023-07-17
Supplement: 41467_2023_39900_MOESM1_ESM.pdf [file 41467_2023_39900_MOESM1_ESM.pdf]

1 **Supplementary Information for**  
2 **Optimal reactive nitrogen control pathways identified for cost-**  
3 **effective PM<sub>2.5</sub> mitigation in Europe**

4  
5 Zehui Liu<sup>1,2</sup>, Harald E. Rieder<sup>3</sup>, Christian Schmidt<sup>3</sup>, Monika Mayer<sup>3</sup>, Yixin Guo<sup>1,2</sup>, Wilfried  
6 Winiwarter<sup>2,4,\*</sup>, Lin Zhang<sup>1,\*</sup>

7 <sup>1</sup> Laboratory for Climate and Ocean-Atmosphere Studies, Department of Atmospheric and  
8 Oceanic Sciences, School of Physics, Peking University, Beijing 100871, China

9 <sup>2</sup> International Institute for Applied Systems Analysis (IIASA), A-2361 Laxenburg, Austria

10 <sup>3</sup> Institute of Meteorology and Climatology, Department of Water, Atmosphere and  
11 Environment, University of Natural Resources and Life Sciences (BOKU), A-1180 Vienna,  
12 Austria

13 <sup>4</sup> Institute of Environmental Engineering, University of Zielona Góra, PL 65-417 Zielona Góra,  
14 Poland

15 \*Corresponding authors. Email: [winiwart@iiasa.ac.at](mailto:winiwart@iiasa.ac.at); [zhanglg@pku.edu.cn](mailto:zhanglg@pku.edu.cn)

16  
17 **This PDF file includes:**

18 Additional information on uncertainty analysis

19 Supplementary Figures S1 to S10

20 Supplementary Tables S1 to S4

21 Supplementary References (I-II)

22  
23  
24 **Additional information on uncertainty analysis.**

25 *Uncertainties in anthropogenic emissions of SIAs precursors in Europe*

26 Supplementary Table 1 shows 2015 total NO<sub>x</sub> (in the form of NO<sub>2</sub>), NH<sub>3</sub>, and SO<sub>2</sub> emissions in  
27 Europe from three global emission inventories (EDGAR<sup>1</sup>, CAMS<sup>2</sup>, and CEDS<sup>3</sup>) and three  
28 regional emission inventories (ECLIPSE, TNO<sup>4</sup>, and EMEP<sup>5</sup>). These inventories are almost at  
29 same spatial resolution (0.1°×0.1°, except for CEDS is 0.5°×0.5°) and geographical extent  
30 (European continent). While differences remain in total emission estimates and detailed spatial  
31 distribution due to different standards, methods and categories<sup>6</sup>. For example, the emission  
32 inventories compiled directly by governments usually have a low estimate (i.e. EMEP and  
33 TNO). The estimate ranges of total NO<sub>x</sub>, NH<sub>3</sub>, and SO<sub>2</sub> emissions in Europe for 2015 are 7.0-  
34 12.5 Tg, 5.3-7.9 Tg, and 7.0-8.8 Tg, and the relative standard deviations are 24%, 17%, and  
35 12%, respectively. These emission deviations slightly alter the effectiveness of Nr emission  
36 controls on PM<sub>2.5</sub> abatement, because the instant efficiency of Nr emission reductions changes  
37 slightly in the early stage (Fig. 3).

38

39 *Uncertainties in air quality modeling*

40 Our study has several limitations in the PM<sub>2.5</sub> model simulations. First, the availability of NH<sub>3</sub>  
41 significantly modulates liquid aerosol pH (increases the aerosol water content and alkalinity)  
42 and then enhances heterogenous production of secondary aerosols<sup>7,8</sup>. While the Model for  
43 Simulating Aerosol Interactions and Chemistry (MOSAIC) aerosol scheme in this study does  
44 not consider the heterogeneous sulfate formation on particle surface and the SOA formation.  
45 We parameterized the former based on Chen et al. (2016)<sup>9</sup> with a fixed liquid aerosol pH and  
46 considered SOA as a multiple of OC concentrations, which would present a lower response of  
47 PM<sub>2.5</sub> changes on NH<sub>3</sub> emission controls. Second, the bidirectional exchange of NH<sub>3</sub> fluxes  
48 alters the availability of surface NH<sub>3</sub><sup>10,11</sup>. However, our study ignored this process due to the  
49 high uncertainty and treated emission and deposition as separate processes, which may alter the  
50 effectiveness of NH<sub>3</sub> emission controls on PM<sub>2.5</sub> abatement. Third, the feedback between the  
51 meteorological fields and chemical fields further changes PM<sub>2.5</sub> formation. We nudged the  
52 meteorological conditions in WRF-Chem every two days using the FNL Analysis data to keep  
53 the simulated meteorological conditions in accordance with the actual conditions, which also  
54 hinder the response of PM<sub>2.5</sub> pollution on real emission reductions. Furthermore, the synergistic  
55 control of other PM<sub>2.5</sub> precursors (such as SO<sub>2</sub>, volatile organic compounds, and primary  
56 aerosols) will also help Europe achieve the WHO AQG, affecting the effectiveness of PM<sub>2.5</sub>  
57 mitigation, which will be considered in the future study.

58

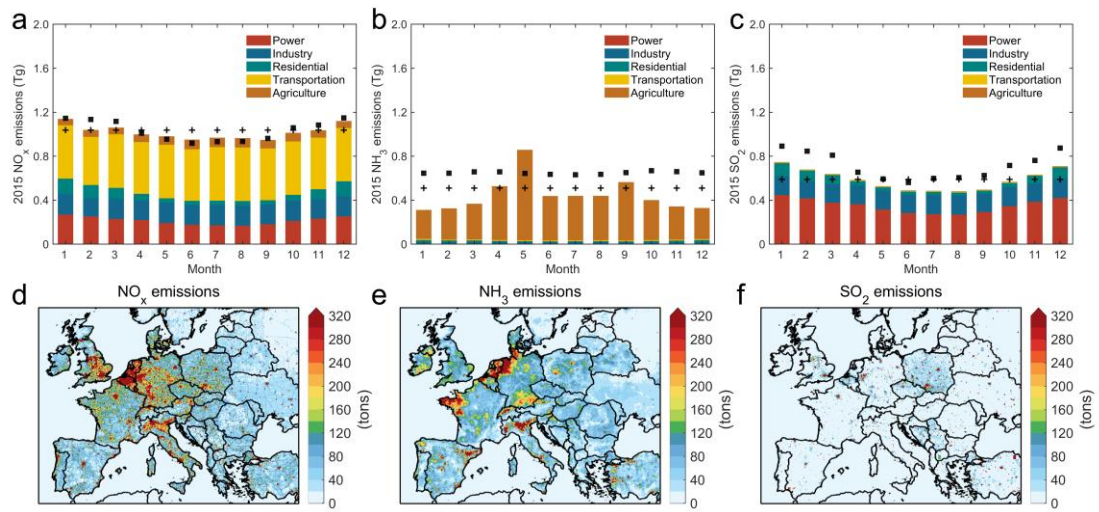

60

61 **Supplementary Fig. 1 | Anthropogenic  $\text{NO}_x$ ,  $\text{NH}_3$ ,  $\text{SO}_2$  emissions over Europe in 2015. a,**  
 62 **b, c,** the seasonal variation of anthropogenic  $\text{NO}_x$  (a),  $\text{NH}_3$  (b), and  $\text{SO}_2$  (c) emissions. **d, e, f,**  
 63 the spatial distribution of anthropogenic  $\text{NO}_x$  (d),  $\text{NH}_3$  (e), and  $\text{SO}_2$  (f) emissions. Squares and  
 64 plus signs in a-c represent monthly total emissions from EDGAR and EMEP, respectively.

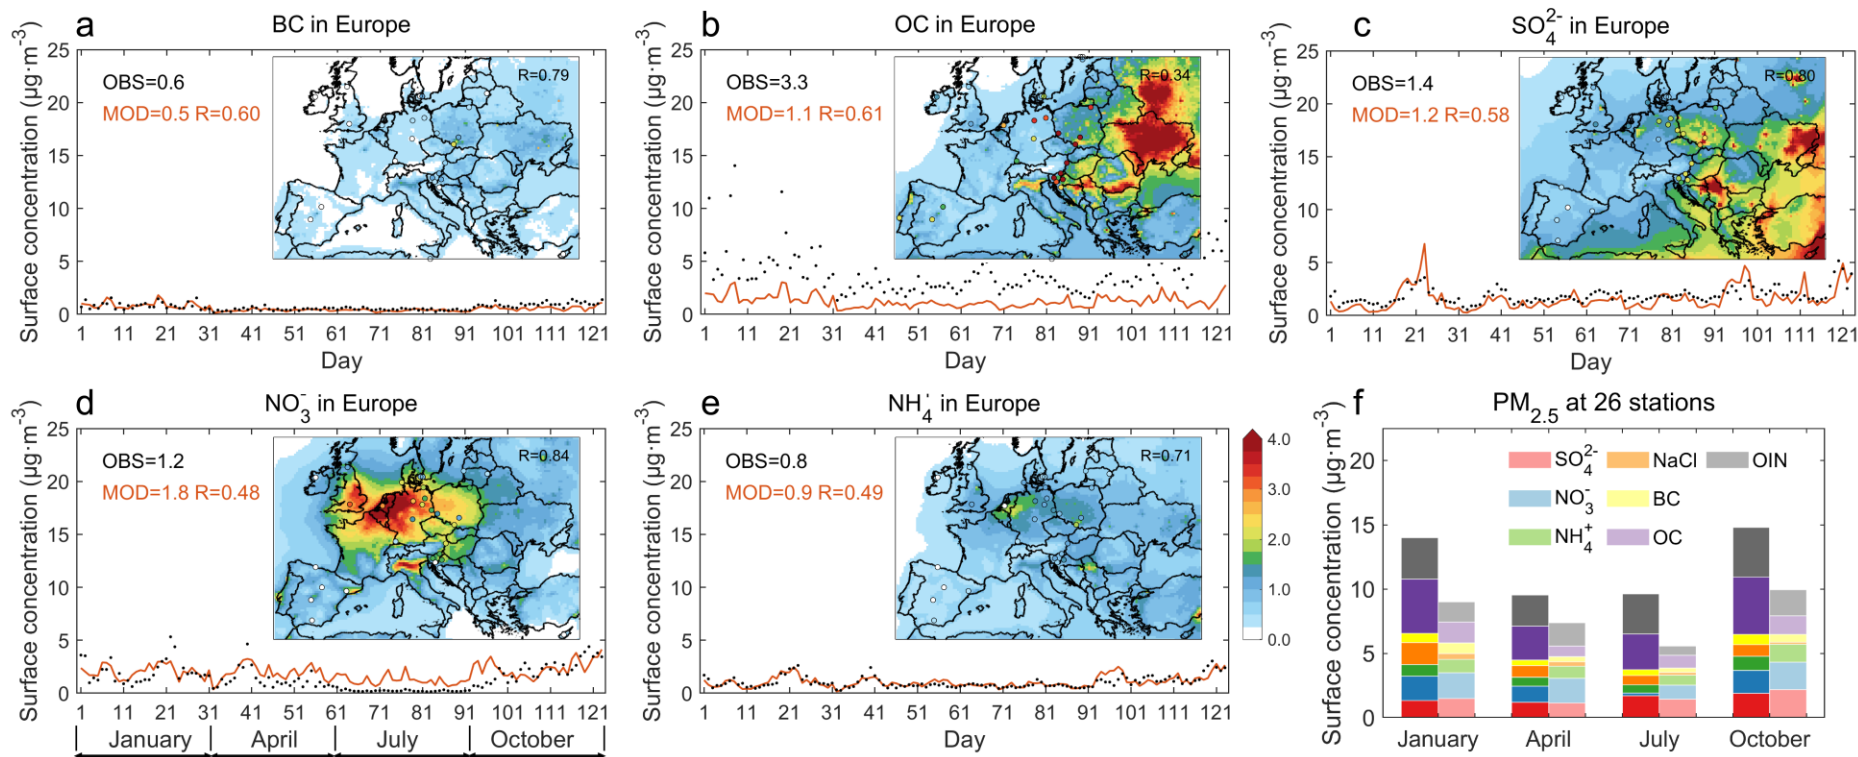

65

66 **Supplementary Fig. 2 | Comparisons between observed and WRF-Chem baseline simulated PM<sub>2.5</sub> components.** a, b, c, d, e, daily time series and spatial  
 67 distribution of observed (black dots and circles) and WRF-Chem Base simulated (red lines and contours) PM<sub>2.5</sub> components, including BC (a), OC (b), sulfate  
 68 (c), nitrate (d), and ammonium (e) concentrations in Europe in 2015. Mean observed values (black), corresponding model results (orange and red), and their  
 69 correlation coefficients are shown as inset. f, comparison between observed (dark bars) and WRF-Chem Base simulated (light bars) mean PM<sub>2.5</sub> components at  
 70 26 stations. Mean observed values (OBS), and corresponding base simulated results (MOD), and their correlation coefficients (temporally and spatially R) are  
 71 shown as inset.

72

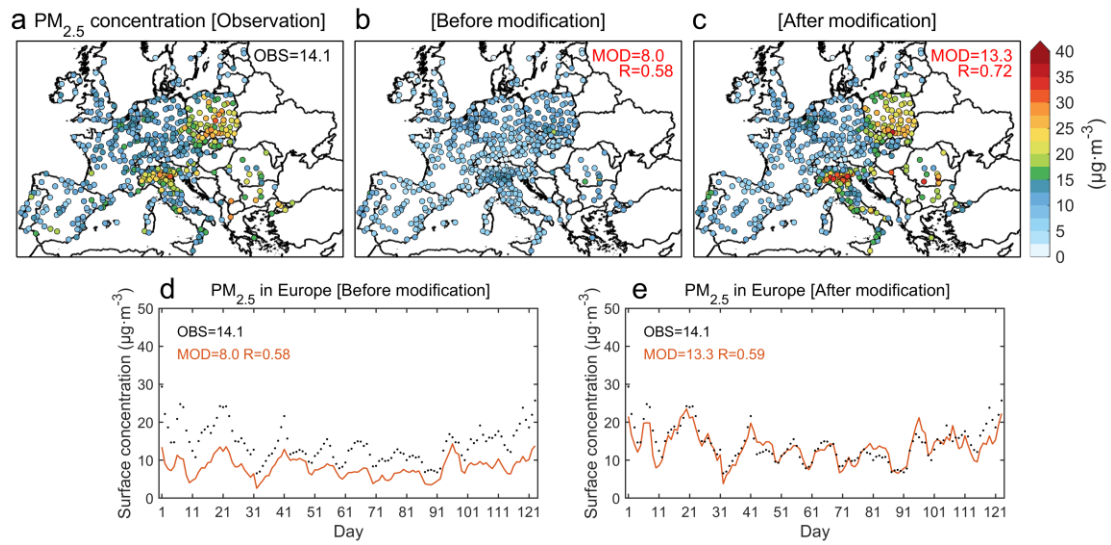

73

74 **Supplementary Fig. 3 | Comparisons between observations and WRF-Chem baseline**  
75 **simulations before and after model modifications. a, b, c,** the spatial distribution of annual  
76 mean surface PM<sub>2.5</sub> concentrations in Europe. **d, e,** time series of daily observed (black dots)  
77 and simulated (red lines) mean PM<sub>2.5</sub> concentrations at European stations. Mean observed  
78 values (OBS), and corresponding base simulated results (MOD), and their correlation  
79 coefficients (temporally and spatially R) are shown as inset.

80

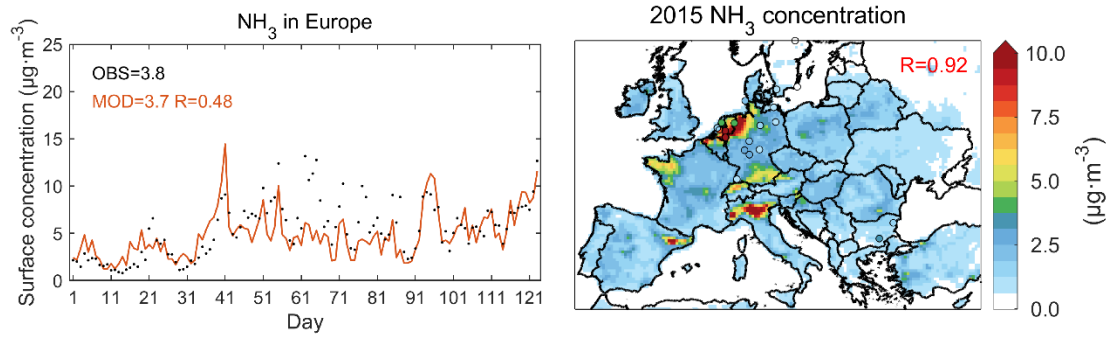

81

82 **Supplementary Fig. 4 | Comparisons between observed and WRF-Chem baseline**  
 83 **simulated surface NH<sub>3</sub> concentrations.** Mean observed values (OBS), and corresponding base  
 84 simulated results (MOD), and their correlation coefficients (temporally and spatially R) are  
 85 shown as inset.

86

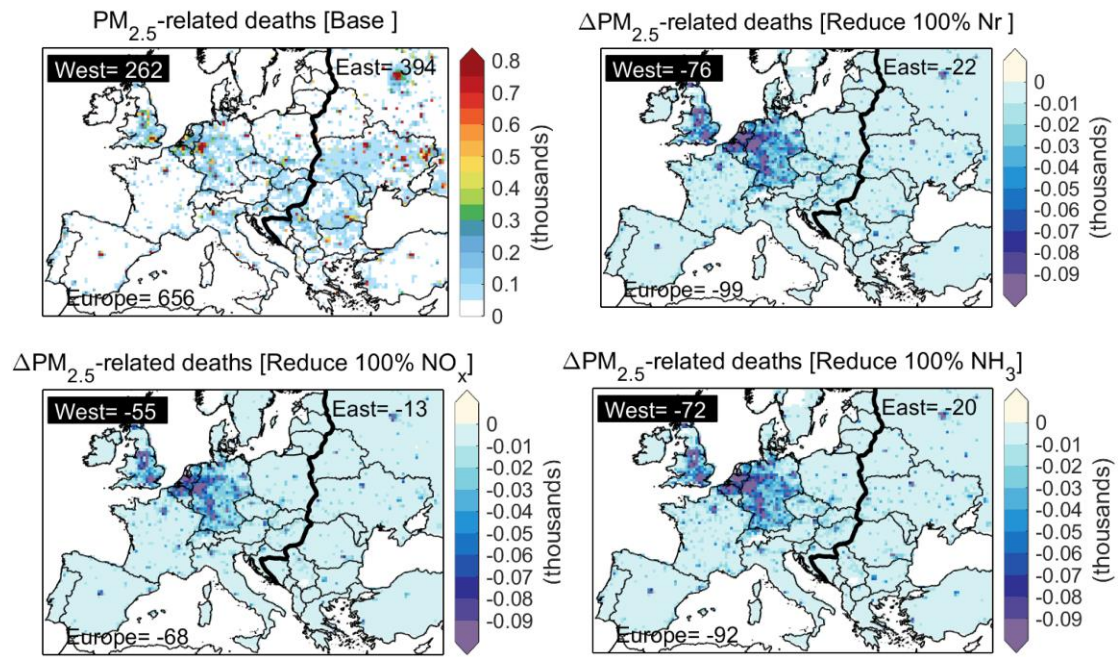

87

88 **Supplementary Fig. 5 | Impacts of reactive nitrogen (Nr) emission controls on PM<sub>2.5</sub>-**

89 **related health burden.** The regional total changes in Western Europe (denoted as West),

90 Eastern Europe (denoted as East), and all Europe (denoted as Europe) are shown as inset

91



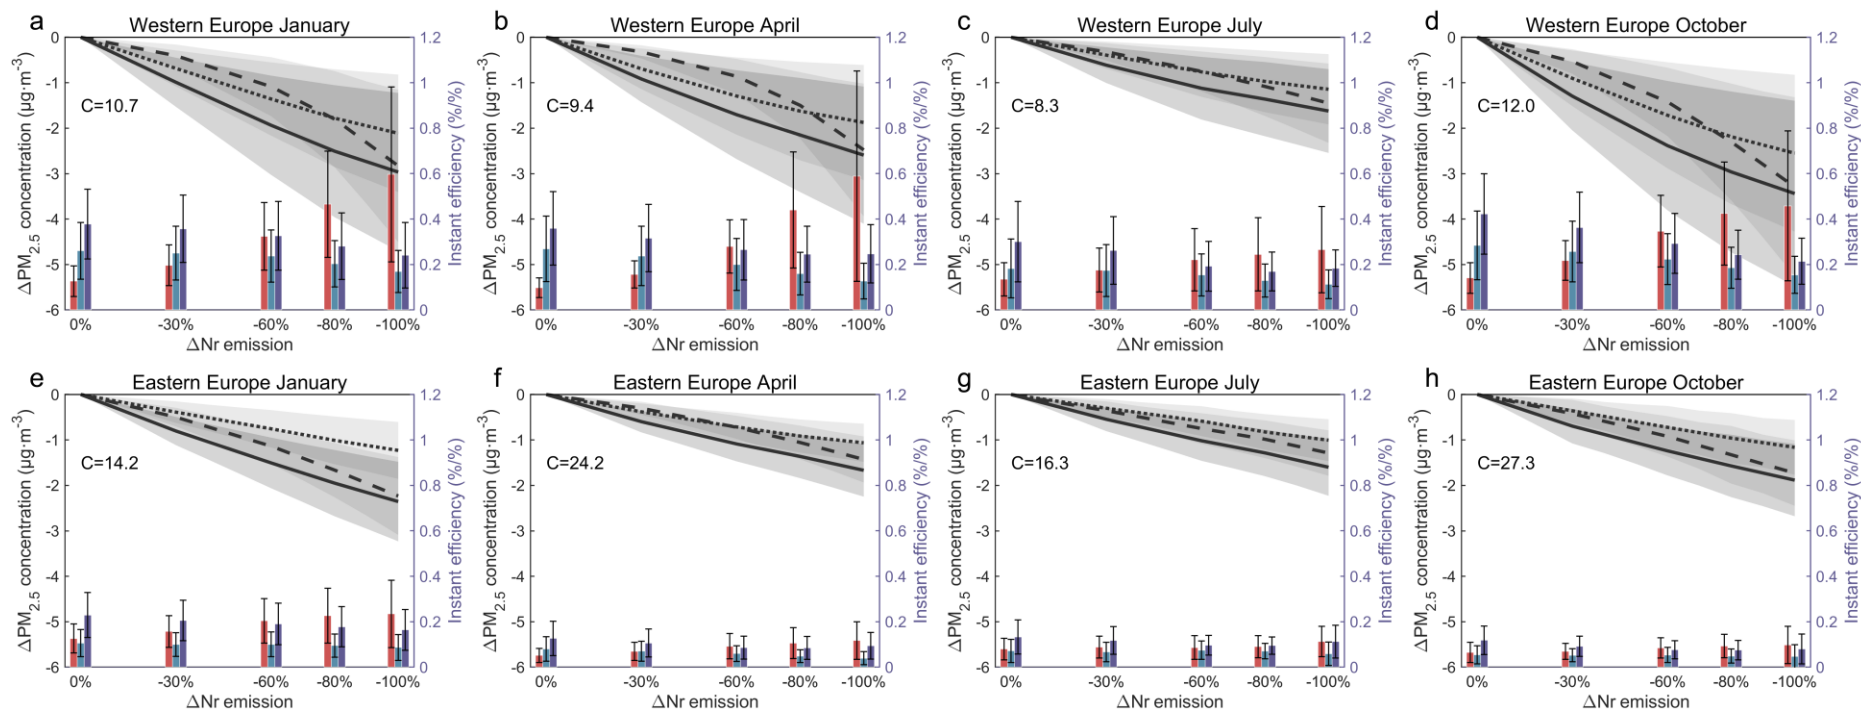

93

94 **Supplementary Fig. 6 | Effectiveness of reactive nitrogen (Nr) emission reductions in Europe in abating regional surface PM<sub>2.5</sub> air pollution for 2015**95 **January, April, July, and October.** Reductions in Western Europe (a-d) and Eastern Europe (e-h) monthly mean PM<sub>2.5</sub> concentrations (black lines), and96 changes in monthly instant efficiency associated with Nr (purple bars), NO<sub>x</sub> (green bars), and NH<sub>3</sub> (red bars) emission controls. The baseline simulated regional97 monthly mean PM<sub>2.5</sub> concentrations (denoted as “C”) are shown as inset. Shading in a-h represent values (means ± one spatial standard deviation) of PM<sub>2.5</sub>98 concentrations or PM<sub>2.5</sub>-related premature deaths. Vertical bars in a-h represent values (means ± one spatial standard deviation) of instant efficiency.

99



100

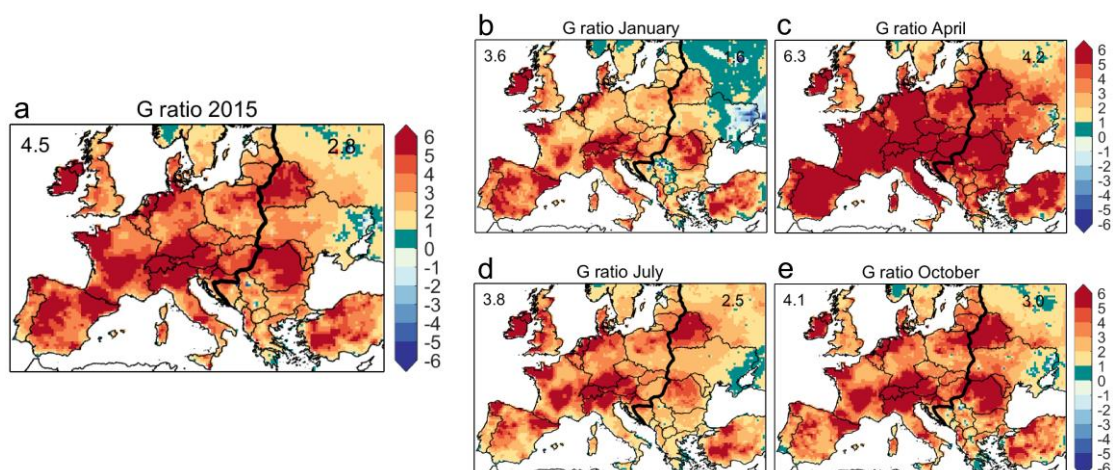

101

102 **Supplementary Fig. 7 | The spatial distribution of the chemical regime (G ratio) in Europe**

103 **in 2015. a, the annual mean G ratio in 2015. b, c, d, e, seasonal variations in the G ratio. The**

104 **regional mean values in Western Europe (left values), Eastern Europe (right values) are shown**

105 **as inset.**

106

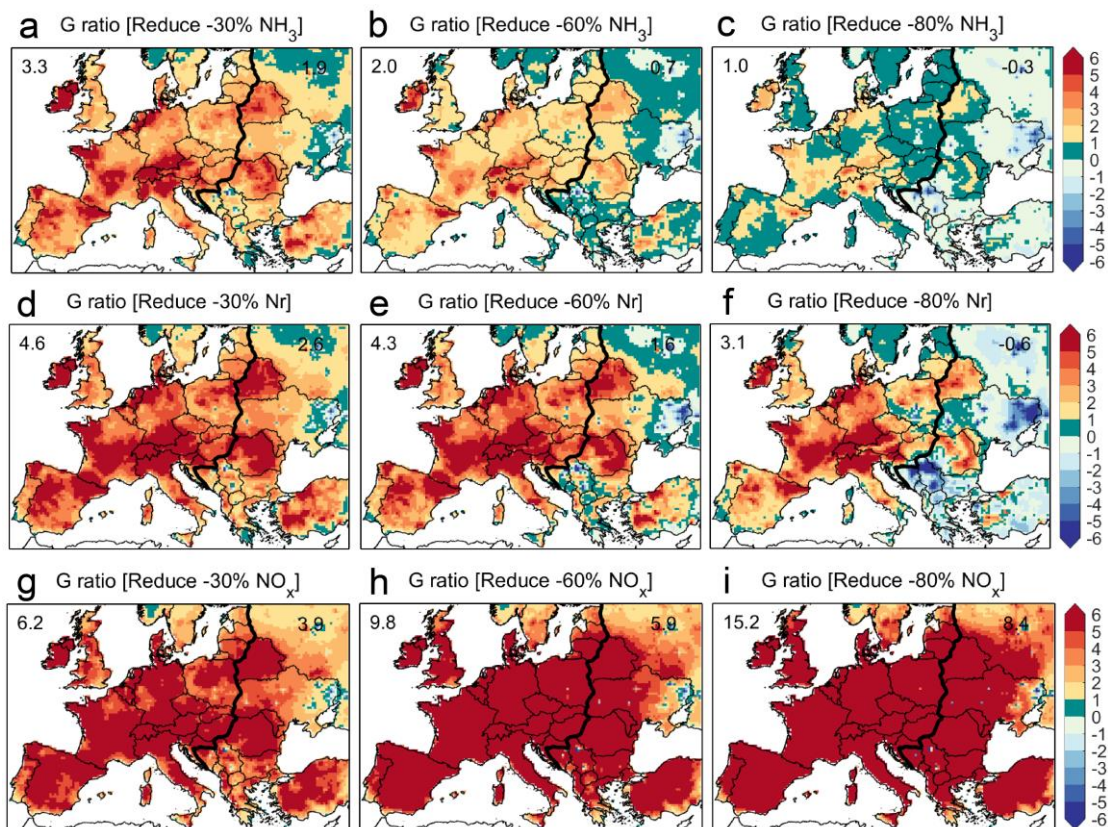

107

108 **Supplementary Fig. 8 | Changes of G ratio on reactive nitrogen (Nr) emission reductions**  
 109 **in Europe in 2015. a, b, c,** changes of G ratio due to 30%, 60% and 80% NH<sub>3</sub> emission  
 110 reductions. **d, e, f,** changes of G ratio due to 30%, 60% and 80% NH<sub>3</sub> and NO<sub>x</sub> emission  
 111 reductions. **g, h, i,** changes of G ratio due to 30%, 60% and 80% NO<sub>x</sub> emission reductions. The  
 112 regional mean values in Western Europe (left values), Eastern Europe (right values) are shown  
 113 as inset.

114

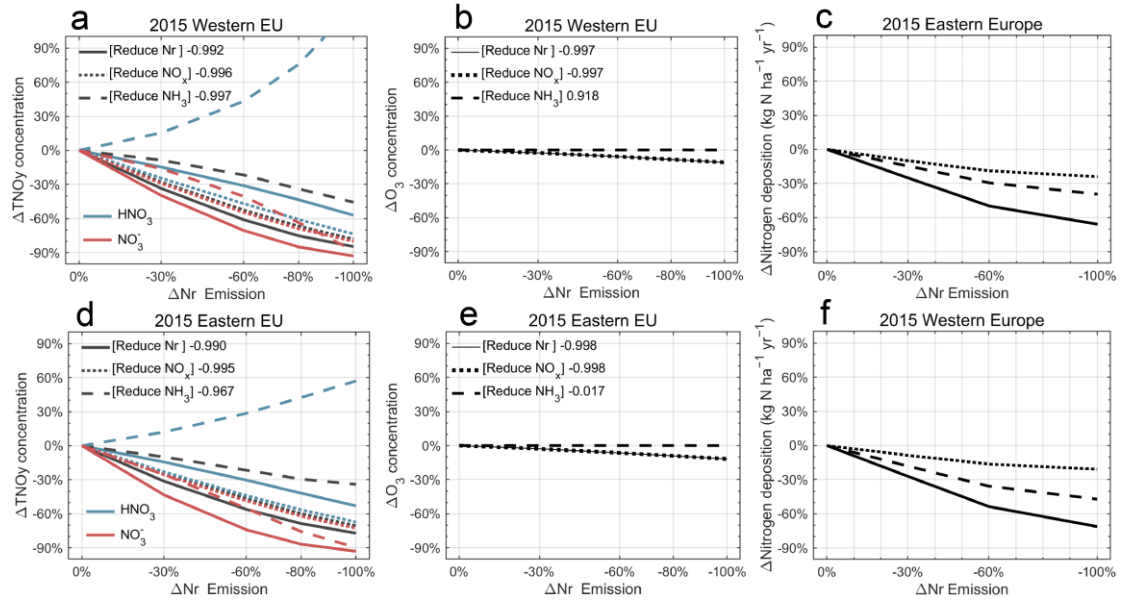

115

116 **Supplementary Fig. 9 | The impacts of reactive nitrogen (Nr) emission controls on nitrate**  
 117 **and oxidants in Europe in 2015.** Reductions in Western Europe (**a-c**) and Eastern Europe (**d-**  
 118 **e**) surface annual mean total nitrate (black lines), HNO<sub>3</sub> (blue lines), NO<sub>3</sub><sup>-</sup> (red lines), O<sub>3</sub>  
 119 concentrations (**b, e**), and nitrogen deposition (**c, f**) when European Nr (solid lines), NO<sub>x</sub> (long  
 120 dash lines), and NH<sub>3</sub> (short dash lines) emissions are gradually abated in 2015. The linear  
 121 regression coefficients are shown as inset.  
 122

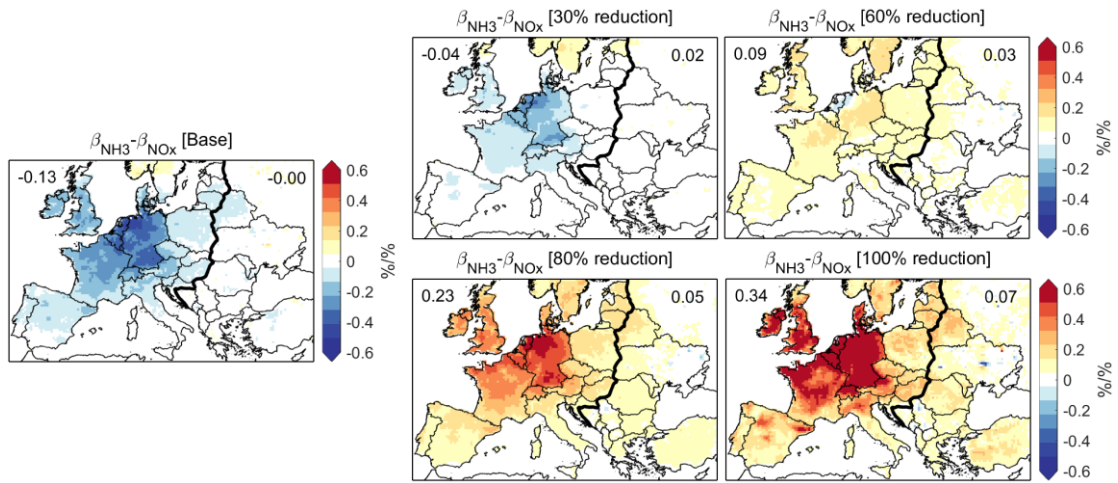

123

124 **Supplementary Fig. 10 | Changes of  $\beta_{\text{NH}_3} - \beta_{\text{NO}_x}$  on 0%, 30%, 60%, 80%, and 100% reactive**  
 125 **nitrogen ( $\text{Nr}$ ,  $\text{NH}_3$  or  $\text{NO}_x$ ) emission reductions in Europe in 2015. The regional mean values**  
 126 **in Western Europe (left values), Eastern Europe (right values) are shown as inset.**

127

128

129 **Supplementary Table 1 | Anthropogenic emission estimates in Europe for 2015.**

| Emissions<br>(Tg N/Tg S) | ECLIPSE<br>(this study) | EDGARv5 <sup>1</sup> | CAMsv5.3 <sup>2</sup> | TNO <sup>4</sup> | EMEP <sup>5</sup> | CEDs <sup>3</sup> |
|--------------------------|-------------------------|----------------------|-----------------------|------------------|-------------------|-------------------|
| NO <sub>x</sub>          | 3.7                     | 3.8                  | 2.3                   | 2.1              | 3.5               | 3.7               |
| NH <sub>3</sub>          | 4.4                     | 6.5                  | 6.3                   | 4.4              | 5.0               | 5.3               |
| SO <sub>2</sub>          | 4.7                     | 5.7                  | 5.8                   | 4.7              | 4.7               | 5.9               |

130 EDGARv5 for 2015 is available at [https://edgar.jrc.ec.europa.eu/dataset\\_ap50](https://edgar.jrc.ec.europa.eu/dataset_ap50).131 CAMsv5.3 for 2015 is available at <https://permalink.aeris-data.fr/CAMS-GLOB-ANT>.132 TNO for 2015 is available at <https://permalink.aeris-data.fr/CAMS-REG-AP>.133 EMEP for 2015 is available at <https://www.ceip.at/the-emep-grid/gridded-emissions>.134 CEDs for 2015 is available at <https://data.pnnl.gov/dataset/CEDS-4-21-21>.

135

136 **Supplementary Table 2 | Evaluation of WRF-Chem baseline simulated SIAs against**137 **observations from EEA over Europe in 2015.**

| Country           | Number<br>of sites | Sulfate |      |      |       | Nitrate |      |      |       | Ammonium |      |      |       |
|-------------------|--------------------|---------|------|------|-------|---------|------|------|-------|----------|------|------|-------|
|                   |                    | OBS     | Base | RMSE | R     | OBS     | Base | RMSE | R     | OBS      | Base | RMSE | R     |
| Austria*          | 1                  | 2.02    | 0.90 | 1.35 | -0.14 | 2.16    | 1.80 | 1.57 | 0.41  | 1.06     | 0.81 | 0.60 | 0.24  |
| Cyprn             | 1                  | 3.30    | 3.34 | 1.95 | 0.66  | 0.16    | 0.42 | 0.58 | 0.38  | 1.07     | 1.16 | 0.64 | 0.67  |
| Germany           | 9                  | 1.61    | 1.31 | 1.19 | 0.72  | 1.76    | 2.57 | 2.09 | 0.54  | 1.06     | 1.19 | 0.85 | 0.67  |
| Denmark*          | 2                  | 0.75    | 0.43 | 0.35 | 0.93  | 0.90    | 1.05 | 0.30 | 0.92  | 0.47     | 0.43 | 0.07 | 0.99  |
| Spain             | 5                  | 0.37    | 0.94 | 1.01 | 0.47  | 0.69    | 0.88 | 1.06 | 0.43  | 0.25     | 0.53 | 0.43 | 0.23  |
| United<br>Kingdom | 2                  | 1.07    | 0.58 | 0.75 | 0.72  | 2.10    | 1.90 | 2.07 | 0.83  | 0.87     | 0.71 | 0.71 | 0.84  |
| Croatia           | 2                  | 1.68    | 1.40 | 1.70 | 0.40  | 0.97    | 1.49 | 1.66 | 0.43  | 1.10     | 0.92 | 0.94 | 0.47  |
| Ireland*          | 1                  | 0.28    | 0.48 | 0.55 | 0.75  | 0.20    | 1.50 | 2.60 | 0.63  | 0.19     | 0.59 | 1.04 | -0.05 |
| Lithuania*        | 1                  | 1.29    | 0.56 | 1.01 | -0.03 | 0.40    | 0.85 | 0.85 | -0.13 | 0.40     | 0.43 | 0.41 | -0.31 |
| Latvia*           | 1                  | 1.32    | 0.87 | 0.86 | 0.37  | 0.53    | 1.08 | 1.17 | -0.10 | 0.52     | 0.60 | 0.52 | 0.27  |
| Netherlands       | 1                  | 1.46    | 0.97 | 0.82 | 0.71  | 2.93    | 4.31 | 2.75 | 0.69  | 0.18     | 1.53 | 1.75 | -0.29 |
| Poland            | 4                  | 2.17    | 1.96 | 2.4  | 0.38  | 1.52    | 2.07 | 1.69 | 0.35  | 0.18     | 1.21 | 0.93 | 0.46  |
| Slovenia          | 4                  | 1.86    | 1.17 | 1.2  | 0.72  | 1.36    | 1.67 | 2.02 | 0.43  | 0.93     | 0.89 | 0.70 | 0.61  |
| Europe            | 34                 | 1.44    | 1.21 | 1.25 | 0.58  | 1.24    | 1.80 | 1.66 | 0.48  | 0.81     | 0.91 | 0.73 | 0.49  |

138 OBS, Base, RMSE, and R refer to mean observed values, and corresponding baseline simulated  
139 results, and their root mean squared error and temporally correlation coefficients.140 \* Station observations are made with a rough temporal resolution (weekly or monthly) in the  
141 country.

142

143

144 **Supplementary Table 3 | Evaluation of WRF-Chem baseline simulated meteorological**  
 145 **fields against observations from NCDC over Europe in January April, July, and October**  
 146 **2015.**

|                               |      | Mean [Observation] | Mean [Base] | Spatial R | Temporal R |
|-------------------------------|------|--------------------|-------------|-----------|------------|
| WSP10<br>(m s <sup>-1</sup> ) | Jan. | 4.5                | 6.1         | 0.46      | 0.67       |
|                               | Apr. | 3.8                | 5.0         | 0.41      | 0.62       |
|                               | Jul. | 3.4                | 4.3         | 0.70      | 0.54       |
|                               | Oct. | 3.1                | 4.4         | 0.60      | 0.57       |
| WSD<br>(°)                    | Jan. | 208.3              | 211.3       | 0.56      | 0.45       |
|                               | Apr. | 208.3              | 209.7       | 0.75      | 0.43       |
|                               | Jul. | 208.0              | 209.4       | 0.56      | 0.44       |
|                               | Oct. | 170.9              | 159.1       | 0.45      | 0.44       |
| T2<br>(°C)                    | Jan. | 4.7                | 2.3         | 0.60      | 0.38       |
|                               | Apr. | 9.7                | 8.1         | 0.78      | 0.83       |
|                               | Jul. | 20.4               | 19.6        | 0.90      | 0.87       |
|                               | Oct. | 10.5               | 9.8         | 0.91      | 0.82       |
| RH2<br>(%)                    | Jan. | 87.3               | 86.5        | 0.54      | 0.41       |
|                               | Apr. | 72.2               | 72.6        | 0.65      | 0.63       |
|                               | Jul. | 68.3               | 70.8        | 0.76      | 0.72       |
|                               | Oct. | 83.4               | 83.2        | 0.56      | 0.64       |

147

148 **Supplementary Table 4 | Diurnal weighting profiles for the anthropogenic emissions from**  
 149 **power, industry, residential, transportation, and agriculture sectors.**

| Hour (UTC)     | 0     | 1     | 2     | 3     | 4     | 5     | 6     | 7     | 8     | 9     | 10    | 11    |
|----------------|-------|-------|-------|-------|-------|-------|-------|-------|-------|-------|-------|-------|
| Power          | 0.033 | 0.030 | 0.029 | 0.028 | 0.029 | 0.032 | 0.035 | 0.040 | 0.043 | 0.046 | 0.048 | 0.049 |
| Industry       | 0.026 | 0.007 | 0.007 | 0.007 | 0.007 | 0.007 | 0.007 | 0.029 | 0.045 | 0.068 | 0.068 | 0.068 |
| Residential    | 0.018 | 0.018 | 0.018 | 0.018 | 0.018 | 0.038 | 0.075 | 0.075 | 0.038 | 0.038 | 0.030 | 0.045 |
| Transportation | 0.017 | 0.013 | 0.014 | 0.015 | 0.016 | 0.016 | 0.029 | 0.056 | 0.060 | 0.059 | 0.059 | 0.054 |
| Agriculture    | 0.021 | 0.019 | 0.019 | 0.018 | 0.019 | 0.021 | 0.029 | 0.033 | 0.047 | 0.058 | 0.070 | 0.078 |
| Hour (UTC)     | 12    | 13    | 14    | 15    | 16    | 17    | 18    | 19    | 20    | 21    | 22    | 23    |
| Power          | 0.049 | 0.050 | 0.050 | 0.050 | 0.050 | 0.049 | 0.048 | 0.047 | 0.047 | 0.044 | 0.040 | 0.035 |
| Industry       | 0.068 | 0.068 | 0.068 | 0.068 | 0.068 | 0.066 | 0.063 | 0.037 | 0.037 | 0.037 | 0.037 | 0.037 |
| Residential    | 0.045 | 0.038 | 0.030 | 0.030 | 0.038 | 0.075 | 0.075 | 0.075 | 0.075 | 0.054 | 0.018 | 0.018 |
| Transportation | 0.050 | 0.059 | 0.060 | 0.062 | 0.059 | 0.057 | 0.056 | 0.049 | 0.045 | 0.042 | 0.031 | 0.022 |
| Agriculture    | 0.089 | 0.082 | 0.080 | 0.070 | 0.060 | 0.044 | 0.030 | 0.027 | 0.023 | 0.021 | 0.021 | 0.021 |

150 UTC refers to Coordinated Universal Time.

151



152

153 **References**

- 154 1 Crippa, M. *et al.* Forty years of improvements in European air quality: regional policy-  
155 industry interactions with global impacts. *Atmos. Chem. Phys.* **16**, 3825-3841 (2016).
- 156 2 Granier, C. *et al.* *The Copernicus atmosphere monitoring service global and regional*  
157 *emissions (April 2019 version)*, Copernicus Atmosphere Monitoring Service, (2019).
- 158 3 Smith, S. J., Zhou, Y., Kyle, P., Wang, H. & Yu, H. In *Proceedings of the 2015*  
159 *International Emission Inventory Conference, San Diego, CA, USA*. 12-16.
- 160 4 Kuenen, J., Visschedijk, A., Jozwicka, M. & Denier Van Der Gon, H. TNO-MACC\_II  
161 emission inventory; a multi-year (2003–2009) consistent high-resolution European  
162 emission inventory for air quality modelling. *Atmos. Chem. Phys.* **14**, 10963-10976  
163 (2014).
- 164 5 Mareckova, K., Wankmueller, R., Moosmann, L. & Pinterits, M. *Inventory Review*  
165 *2013: Review of emission data reported under the LRTAP Convention and NEC*  
166 *Directive: Stage 1 and 2 review, Status of gridded and LPS data, EMEP*. (EEA,  
167 Technical Report CEIP 1/2013, 2013).
- 168 6 Trombetti, M. *et al.* Spatial inter-comparison of Top-down emission inventories in  
169 European urban areas. *Atmos. Environ.* **173**, 142-156,  
170 doi:10.1016/j.atmosenv.2017.10.032 (2018).
- 171 7 Zheng, G. *et al.* Multiphase buffer theory explains contrasts in atmospheric aerosol  
172 acidity. *Science* **369**, 1374-1377, doi:10.1126/science.aba3719 (2020).
- 173 8 Lv, S. *et al.* Gas-to-Aerosol Phase Partitioning of Atmospheric Water-Soluble Organic  
174 Compounds at a Rural Site in China: An Enhancing Effect of NH<sub>3</sub> on SOA Formation.  
175 *Environ. Sci. Technol.* **56**, 3915-3924, doi:10.1021/acs.est.1c06855 (2022).
- 176 9 Chen, D., Liu, Z., Fast, J. & Ban, J. Simulations of sulfate–nitrate–ammonium (SNA)  
177 aerosols during the extreme haze events over northern China in October 2014. *Atmos.*  
178 *Chem. Phys.* **16**, 10707-10724, doi:10.5194/acp-16-10707-2016 (2016).
- 179 10 Zhu, L. *et al.* Global evaluation of ammonia bidirectional exchange and livestock  
180 diurnal variation schemes. *Atmos. Chem. Phys.* **15**, 12823-12843, doi:10.5194/acp-15-  
181 12823-2015 (2015).
- 182 11 Bash, J. O., Cooter, E. J., Dennis, R. L., Walker, J. T. & Pleim, J. E. Evaluation of a  
183 regional air-quality model with bidirectional NH<sub>3</sub> exchange coupled to an  
184 agroecosystem model. *Biogeosciences* **10**, 1635-1645, doi:10.5194/bg-10-1635-2013  
185 (2013).

186
